# Supplementary material for: Evaluation of a deep learning system for the joint automated detection of diabetic retinopathy and age‐related macular degeneration
Source: PubMed Central journal article supplement — Acta Ophthalmol. 2019 Nov 26;98(4):368–77. doi: 10.1111/aos.14306 (PMC7318689; doi:10.1111/aos.14306), 2019-11-26
Supplement: AOS-98-368-s002.pdf [file AOS-98-368-s002.pdf]

**Figure S2.** Receiver operating characteristic curves for individual detection of referable DR and AMD in the DR-AMD dataset.

- A.** DR vs. controls (527 images): AUC, 95.6% ;95% CI, 91.8%-98.6%      **B.** AMD vs. controls (489 images): AUC, 95.2%; 95% CI, 91.0%-98.1%

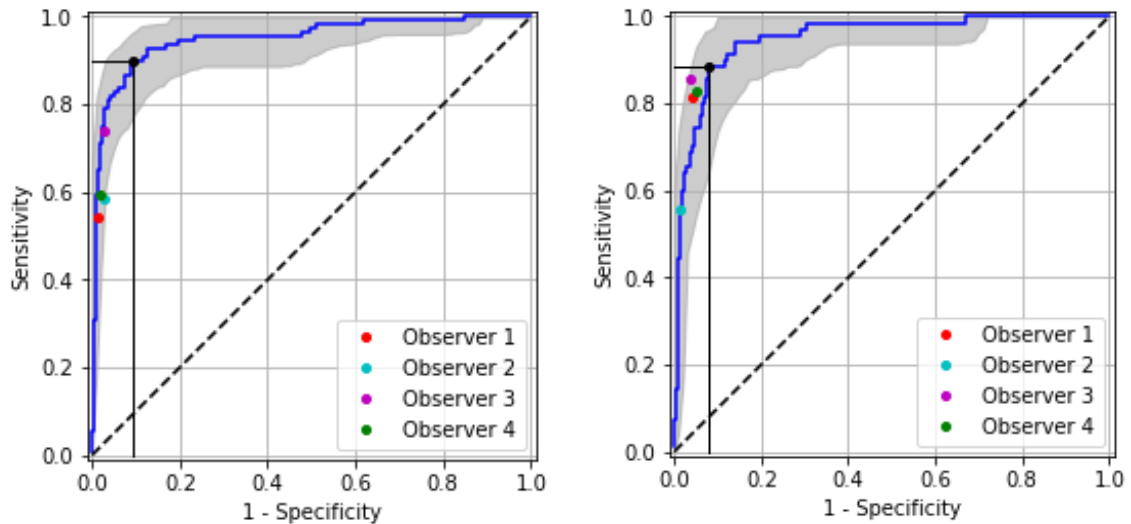

Performance of RetCAD v.1.3.0 (blue curves; 95% CI within gray area) and human observers (colored circles) in the DR-AMD dataset for individual detection of referable DR (527 images with referable DR and control cases) (A) and individual detection of referable AMD (489 images with referable AMD and control cases) (B). The black circle indicates the SE and SP of RetCAD v.1.3.0 at its optimal operating point. In A, SE was 91.7% (95% CI, 85.3%-98.0%) and SP was 90.9% (95% CI, 86.7%-96.7%). In B, SE was 88.6% (95% CI, 83.8%-100.0%) and SP was 92.1% (95% CI, 84.3%-95.2%).

Abbreviations: DR, Diabetic retinopathy; AMD, Age-related macular degeneration; AUC, Area under the receiver operating characteristic curve; SE, sensitivity; SP, specificity; CI, confidence interval.
