# Supplementary material for: Evaluation of a deep learning system for the joint automated detection of diabetic retinopathy and age‐related macular degeneration
Source: PubMed Central journal article supplement — Acta Ophthalmol. 2019 Nov 26;98(4):368–77. doi: 10.1111/aos.14306 (PMC7318689; doi:10.1111/aos.14306), 2019-11-26
Supplement: AOS-98-368-s003.pdf [file AOS-98-368-s003.pdf]

**Figure S3.** Interrater disagreement in DR grading stages among independent human observers and reference standard in Messidor (1200 images).

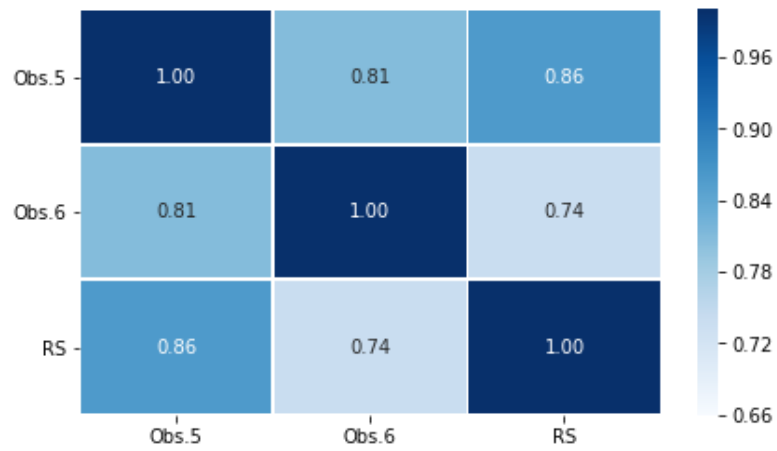

Interrater heatmap with quadratic Cohen's weighted kappa coefficients comparing disease staging for DR among the 2 independent human observers and the reference standard in Messidor (1200 images).

Abbreviations: DR, Diabetic retinopathy; AMD, Age-related macular degeneration; Obs., Observer; RS, Reference Standard.
