# Supplementary material for: Evaluation of a deep learning system for the joint automated detection of diabetic retinopathy and age‐related macular degeneration
Source: PubMed Central journal article supplement — Acta Ophthalmol. 2019 Nov 26;98(4):368–77. doi: 10.1111/aos.14306 (PMC7318689; doi:10.1111/aos.14306), 2019-11-26
Supplement: AOS-98-368-s004.pdf [file AOS-98-368-s004.pdf]

**Figure S4.** Receiver operating characteristic curve for individual detection of referable DR in Messidor-2 (874 subjects).

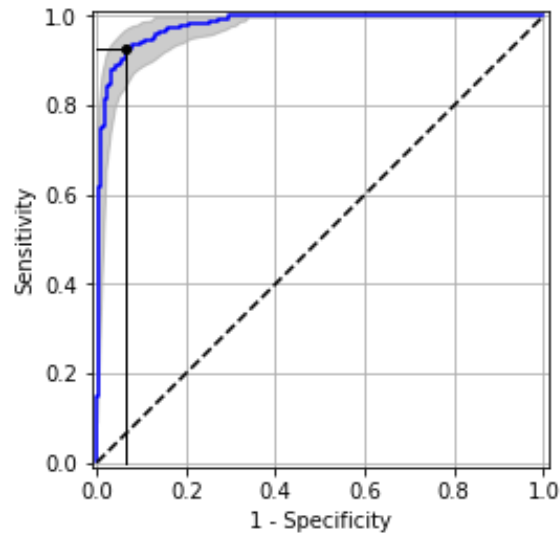

Performance of RetCAD v.1.3.0 (blue curve; 95% CI within gray area) in Messidor-2 (874 subjects) for individual detection of referable DR. The black circle indicates the sensitivity (SE) and specificity (SP) of RetCAD v.1.3.0 at its optimal operating point. SE was 92.6% (95% CI, 88.4%-97.4%) and SP was 93.4% (95% CI, 89.9%-97.2%). AUC was 98.0% (95% CI, 96.8%-99.0%).

Abbreviations: DR, Diabetic retinopathy; AUC, Area under the receiver operating characteristic curve; SE, Sensitivity; SP, Specificity; CI, Confidence interval.
