# Supplementary material for: Evaluation of a deep learning system for the joint automated detection of diabetic retinopathy and age‐related macular degeneration
Source: PubMed Central journal article supplement — Acta Ophthalmol. 2019 Nov 26;98(4):368–77. doi: 10.1111/aos.14306 (PMC7318689; doi:10.1111/aos.14306), 2019-11-26
Supplement: AOS-98-368-s005.pdf [file AOS-98-368-s005.pdf]

**Table S1.** Diagnostic performance for individual detection of referable DR and AMD of RetCAD v.1.3.0 and observers compared with reference standard in the DR-AMD dataset.

|                         |           | RetCAD          |           | Obs. 1       |           | Obs. 2       |           | Obs. 3       |           | Obs. 4      |           |
|-------------------------|-----------|-----------------|-----------|--------------|-----------|--------------|-----------|--------------|-----------|-------------|-----------|
| <b>DR (527 images)</b>  |           | <b>R</b>        | <b>NR</b> | <b>R</b>     | <b>NR</b> | <b>R</b>     | <b>NR</b> | <b>R</b>     | <b>NR</b> | <b>R</b>    | <b>NR</b> |
| <b>RS</b>               | <b>R</b>  | 98              | 10        | 59           | 49        | 64           | 44        | 81           | 27        | 65          | 43        |
|                         | <b>NR</b> | 38              | 381       | 6            | 413       | 10           | 409       | 13           | 406       | 8           | 411       |
|                         |           | <b>SE (%)</b>   |           | 91.7         |           | 54.6         |           | 59.3         |           | 75.0        |           |
|                         |           | <b>(95% CI)</b> |           | (85.3-98.0)  |           | (40.4-67.3)  |           | (45.6-72.1)  |           | (63.2-86.4) |           |
|                         |           | <b>SP (%)</b>   |           | 90.9         |           | 98.6         |           | 97.6         |           | 96.9        |           |
|                         |           | <b>(95% CI)</b> |           | (86.7-96.7)  |           | (96.7-100.0) |           | (95.4-99.5)  |           | (94.4-99.0) |           |
| <b>AMD (489 images)</b> |           | <b>R</b>        | <b>NR</b> | <b>R</b>     | <b>NR</b> | <b>R</b>     | <b>NR</b> | <b>R</b>     | <b>NR</b> | <b>R</b>    | <b>NR</b> |
| <b>RS</b>               | <b>R</b>  | 61              | 9         | 57           | 13        | 39           | 31        | 60           | 10        | 58          | 12        |
|                         | <b>NR</b> | 33              | 386       | 18           | 401       | 5            | 414       | 15           | 404       | 21          | 398       |
|                         |           | <b>SE (%)</b>   |           | 88.6         |           | 81.4         |           | 55.7         |           | 85.7        |           |
|                         |           | <b>(95% CI)</b> |           | (83.8-100.0) |           | (66.7-94.3)  |           | (39.0-72.4)  |           | (73.3-96.8) |           |
|                         |           | <b>SP (%)</b>   |           | 92.1         |           | 95.7         |           | 98.8         |           | 96.4        |           |
|                         |           | <b>(95% CI)</b> |           | (84.3-95.2)  |           | (92.9-98.1)  |           | (97.1-100.0) |           | (93.7-98.6) |           |

For individual detection of referable DR: 527 images with referable DR and control cases. For individual detection of referable AMD: 489 images with referable AMD and control cases.

Abbreviations: DR, Diabetic retinopathy; AMD, Age-related macular degeneration; RS, Reference standard; Obs., Observer; R, Referable; NR, Non-referable; C, Control; SE, Sensitivity; SP, Specificity; CI, Confidence interval.
