# Supplementary material for: Evaluation of a deep learning system for the joint automated detection of diabetic retinopathy and age‐related macular degeneration
Source: PubMed Central journal article supplement — Acta Ophthalmol. 2019 Nov 26;98(4):368–77. doi: 10.1111/aos.14306 (PMC7318689; doi:10.1111/aos.14306), 2019-11-26
Supplement: AOS-98-368-s006.pdf [file AOS-98-368-s006.pdf]

**Table S2.** Diagnostic performance for individual detection of referable DR of RetCAD v.1.3.0 and observers compared with reference standard in Messidor (1200 images).

|    |                 | DR stage | RetCAD      |     | Obs. 5      |     | Obs. 6       |     |
|----|-----------------|----------|-------------|-----|-------------|-----|--------------|-----|
|    |                 |          | NR          | R   | NR          | R   | NR           | R   |
| RS | NR              | 0        | 543         | 4   | 542         | 5   | 545          | 2   |
|    |                 | 1        | 102         | 51  | 142         | 11  | 149          | 4   |
|    | R               | 2        | 40          | 207 | 92          | 155 | 121          | 126 |
|    |                 | 3        | 1           | 252 | 100         | 243 | 34           | 219 |
|    | <b>SE (%)</b>   |          | 92.0        |     | 79.6        |     | 69.0         |     |
|    | <b>(95% CI)</b> |          | (89.1-95.9) |     | (74.8-84.8) |     | (62.9-74.7)  |     |
|    | <b>SP (%)</b>   |          | 92.1        |     | 97.7        |     | 99.1         |     |
|    | <b>(95% CI)</b> |          | (88.7-95.2) |     | (96.0-99.2) |     | (97.9-100.0) |     |

Abbreviations: RS, Reference Standard; DR, Diabetic retinopathy; R, Referable; NR, Non-referable; Obs., Observer; SE, Sensitivity; SP, Specificity; CI, Confidence interval.
