# Supplementary material for: Evaluation of a deep learning system for the joint automated detection of diabetic retinopathy and age‐related macular degeneration
Source: PubMed Central journal article supplement — Acta Ophthalmol. 2019 Nov 26;98(4):368–77. doi: 10.1111/aos.14306 (PMC7318689; doi:10.1111/aos.14306), 2019-11-26
Supplement: AOS-98-368-s007.pdf [file AOS-98-368-s007.pdf]

**Table S3.** Diagnostic performance for individual detection of referable AMD of RetCAD v.1.3.0 compared with reference standard in the AREDS dataset (133821 images).

|           |           | <b>RetCAD</b>    |             |          |
|-----------|-----------|------------------|-------------|----------|
| <b>RS</b> | <b>NR</b> | <b>AMD stage</b> | <b>NR</b>   | <b>R</b> |
|           |           | <b>1</b>         | 39954       | 1455     |
|           | <b>2</b>  | 24018            | 8974        |          |
|           | <b>R</b>  | <b>3</b>         | 7263        | 34232    |
|           |           | <b>4</b>         | 1146        | 16779    |
|           |           | <b>SE (%)</b>    | 85.8        |          |
|           |           | <b>(95% CI)</b>  | (84.6-86.2) |          |
|           |           | <b>SP (%)</b>    | 86.0        |          |
|           |           | <b>(95% CI)</b>  | (85.7-87.4) |          |

Abbreviations: RS, Reference standard; AMD, Age-related macular degeneration; R, Referable; NR, Non-referable; SE, Sensitivity; SP, Specificity; CI, Confidence interval.
