# Supplementary material for: Evaluation of a deep learning system for the joint automated detection of diabetic retinopathy and age‐related macular degeneration
Source: PubMed Central journal article supplement — Acta Ophthalmol. 2019 Nov 26;98(4):368–77. doi: 10.1111/aos.14306 (PMC7318689; doi:10.1111/aos.14306), 2019-11-26
Supplement: AOS-98-368-s008.pdf [file AOS-98-368-s008.pdf]

**Table S4.** Diagnostic performance for individual detection of referable DR of RetCAD v.1.3.0 compared with reference standard in Messidor-2 (874 subjects).

|           | <b>DR label</b>                  | <b>RetCAD</b>       |          |
|-----------|----------------------------------|---------------------|----------|
|           |                                  | <b>NR</b>           | <b>R</b> |
| <b>RS</b> | <b>NR</b>                        | 639                 | 45       |
|           | <b>R</b>                         | 15                  | 175      |
|           | <b>SE (%)</b><br><b>(95% CI)</b> | 92.6<br>(88.4-97.4) |          |
|           | <b>SP (%)</b><br><b>(95% CI)</b> | 93.4<br>(89.9-97.2) |          |

Abbreviations: RS, Reference standard; DR, Diabetic retinopathy; R, Referable; NR, Non-referable; SE, Sensitivity; SP, Specificity; CI, Confidence interval.
